# Supplementary material for: Thermochromism of overcrowded bistricyclic aromatic enes (BAEs). A theoretical study
Source: Royal Society of Chemistry journal article supplement (doi:10.1039/b101797g), 2001-01-01
Supplement: b101797g.doc [file b101797g.doc]

Supporting Material **Table S1:** Semiempirical and *Ab Initio* Total Energies of BAEs

| Method | AM1 *a* | | PM3 *a* | | HF/6‑31G* | | | B3LYP/6‑31G* | |
| --- | --- | --- | --- | --- | --- | --- | --- | --- | --- |
|  | *b* | ***H*** | *b* | ***H*** | *b*,*c* | | ***E*tot** | *b*,*d* | ***E*tot** |
|  |  | [kcal/mol] |  | [kcal/mol] |  | | [a.u.] |  | [a.u.] |
| Bianthrone (**1**) | | | |  |  | |  |  |  |
| **a**-*C*2h | Min | 75.03988 | Min | 61.19602 | Min | | -1219.38686 | Min | -1227.07651 |
| **t**-*D*2 | Min | 87.222228 | TS | 78.360662 | Min | | -1219.36156 | Min | -1227.07192 |
| **s**-*C*2v | Min | 83.137262 | Min | 64.624131 | Min | | -1219.36961 | Min | -1227.05996 |
| Dixanthylene (**2**) | | | |  |  | |  |  |  |
| **a**-*C*2h | Min | 80.720974 | Min | 65.727809 | Min | | -1143.61540 | Min | -1150.84090 |
| **t**-*D*2 | Min | 88.305401 | Min | 74.377659 | TS | | -1143.58832 | Min | -1150.83162 |
| **s**-*C*2v | Min | 90.078725 | Min | 69.776565 | Min | | -1143.59972 | Min | -1150.82639 |
| Xanthylidene-anthrone (**8**) | | | | |  | |  |  |  |
| **au**-*C*s | Min | 77.683511 | Min | 63.254123 | Min | | -1181.50153 | Min | -1188.95940 |
| **t**-*C*2 | Min | 86.924282 | TS | 75.688107 | Min | | -1181.47844 | Min | -1188.95528 |
| **su**-*C*s | Min | 86.25418 | Min | 66.930786 | Min | | -1181.48517 | Min | -1188.94368 |
| Dithioxanthylene (**3**) | | | |  |  | |  |  |  |
| **a**-*C*2h | Min | 140.08948 | Min | 145.19071 | Min | | -1788.92528 | Min | -1796.78485 |
| **s**-*C*2v | Min | 146.89775 | Min | 148.49654 | Min | | -1788.91072 | Min | -1796.77154 |
| **t**-*D*2 | Min | 154.36695 | TS | 165.31129 | TS | | -1788.86452 | Min | -1796.75188 |
| Bisdibenzocycloheptenylidene (**5**) | | | | | | | |  |  |
| **a**-*C*2h | Min | 160.63353 | Min | 155.40737 | Min | -1147.68877 | | Min | -1155.22220 |
| **s**-*C*2v | Min | 162.33512 | Min | 155.92432 | Min | -1147.68102 | | Min | -1155.21462 |
| **t**-*D*2 | TS | 206.53456 | 2 | 205.92397 | TS | -1147.58668 | | TS | -1155.15863 |
| Bifluorenylidene (**4**) | | | |  |  |  | |  |  |
| **t**-*D*2 | Min | 154.58413 | Min | 140.87427 | Min | -993.90996 | | Min | -1000.42029 |
| **a**-*C2h* | Min | 159.87817 | Min | 145.48165 | Min | -993.89725 | | Min | -1000.40545 |
| **s**-*C*2v | 2 | 169.93207 | TS | 149.03408 | TS | -993.88213 | | 2 | -1000.39200 |
| Fluorenylidene-xanthene (**6**) | | | | | |  | |  |  |
| **t**-*C*2 | Min | 121.12284 | Min | 107.48605 | Min | -1068.75146 | | Min | -1075.62838 |
| **au**-*C*s | Min | 118.77328 | Min | 104.11719 | Min | -1068.76002 | | Min | -1075.62668 |
| Fluorenylidene-anthrone (**7**) | | | | | |  | |  |  |
| **t**-*C*2 | Min | 121.15969 | TS | 110.05967 | Min | -1106.63568 | | Min | -1113.74520 |
| **au**-*C*s | Min | 115.44241 | Min | 101.1226 | Min | -1106.64485 | | Min | -1113.74310 |

*a* J.J.P. Stewart, MOPAC 6.00, QCPE 455, 1990.

*b* Minimum (Min), transition state (TS) or number of imaginary vibrational frequencies.

*c* Vibrational frequencies calculated at the HF/STO‑3G level.

*d* Vibrational frequencies calculated at the B3LYP/STO‑3G level.

Supporting Material **Table S2:** Calculated and Experimental Relative Energies of BAEs *a*

|  | Bridges |  | AM1 | PM3 | HF/ 6‑31G* | B3LYP/ 6‑31G* | Exptl. |
| --- | --- | --- | --- | --- | --- | --- | --- |
|  | **X, Y** |  | **ΔΔ*H*** | **ΔΔ*H*** | **Δ*E*rel *b*** | **Δ*E*rel *c*** | **Δ*H*A****B** |
| Bianthrone | | |  |  |  |  |  |
| **1** | CO, CO | **a**-*C*2h | 0.0 | 0.0 | 0.0 | 0.0 |  |
| **1** | CO, CO | **t**-*D*2 | 51.0 | 71.8 *d* | 66.4 | 12.0 | 12.6 |
| **1** | CO, CO | **s**-*C*2v | 33.9 | 14.3 | 45.3 | 43.4 |  |
| Dixanthylene | | |  |  |  |  |  |
| **2** | O, O | **a**-*C*2h | 0.0 | 0.0 | 0.0 | 0.0 |  |
| **2** | O, O | **t**-*D*2 | 31.7 | 36.2 | 71.1 *d* | 24.4 | 23.4 |
| **2** | O, O | **s**-*C*2v | 39.2 | 16.9 | 41.2 | 38.1 |  |
| Dithioxanthylene | | |  |  |  |  |  |
| **3** | S, S | **a**-*C*2h | 0.0 | 0.0 | 0.0 | 0.0 |  |
| **3** | S, S | **s**-*C*2v | 28.5 | 13.8 | 38.2 | 35.0 |  |
| **3** | S, S | **t**-*D*2 | 59.7 | 84.2 *d* | 159.5 *d* | 86.6 |  |
| Bifluorenylidene | | |  |  |  |  |  |
| **4** | ―, ― | **t**-*D*2 | 0.0 | 0.0 | 0.0 | 0.0 |  |
| **4** | ―, ― | **a**-*C*2h | 22.2 | 19.3 | 33.4 | 39.0 |  |
| **4** | ―, ― | **s**-*C*2v | 64.2 *e* | 34.1 *d* | 73.1 *d* | 74.3 *d* |  |
| Bisdibenzocycloheptenylidene | | |  |  |  |  |  |
| **5** | CH=CH, CH=CH | **a**-*C*2h | 0.0 | 0.0 | 0.0 | 0.0 |  |
| **5** | CH=CH, CH=CH | **s**-*C*2v | 7.1 | 2.2 | 20.4 | 19.9 |  |
| **5** | CH=CH, CH=CH | **t**-*D*2 | 192.0 *d* | 211.4 *e* | 268.0 *d* | 166.9 *d* |  |
| Fluorenylidene-xanthene | | |  |  |  |  |  |
| **6** | ―, O | **t**-*C*2 | 0.0 | 0.0 | 0.0 | 0.0 |  |
| **6** | ―, O | **au**-*C*s | -9.8 | -14.1 | -22.5 | 4.5 |  |
| Fluorenylidene-anthrone | | |  |  |  |  |  |
| **7** | ―, CO | **t**-*C*2 | 0.0 | 0.0 *d* | 0.0 | 0.0 |  |
| **7** | ―, CO | **au**-*C*s | -23.9 | -37.4 | -24.1 | 5.5 |  |
| Xanthylidene-anthrone | | |  |  |  |  |  |
| **8** | O, CO | **au**-*C*s | 0.0 | 0.0 | 0.0 | 0.0 |  |
| **8** | O, CO | **t**-*C*2 | 38.7 | 52.0 *d* | 60.6 | 10.8 | 14.6 |
| **8** | O, CO | **su**-*C*s | 35.9 | 15.4 | 43.0 | 41.3 |  |

*a* Energies in kJ/mol; all conformations are minima unless noted otherwise.

*b* Vibrational frequencies calculated at the HF/STO‑3G level.

*c* Vibrational frequencies calculated at the B3LYP/STO‑3G level.

*d* Transition state.

*e* Second order saddle point.

Supporting Material **Table S3:** Selected B3LYP/6‑31G* Geometrical Parameters and Frontier Orbital Energies

|  |  | Twist *a* | Fold *b* | C9=C9’ | C1C1’ | H1H1’ | HOMO | LUMO | Gap *c* | λ *d* |
| --- | --- | --- | --- | --- | --- | --- | --- | --- | --- | --- |
|  |  | ***ω*** [°] | ***φ*** [°] | [Å] | [Å] | [Å] | [eV] | [eV] | [nm] | [nm] |
| **1** | **a**-*C*2h | 0.0 | 41.5 | 1.370 | 3.01 | 3.13 | -6.02 | -2.45 | 348 | 385 |
| **1** | **t**-*D*2 | 55.0 | 4.4 | 1.426 | 3.13 | 2.78 | -5.29 | -3.47 | 682 | 700 |
| **1** | **s**-*C*2v | 0.0 | 42.5 | 1.372 | 3.08 | 2.03 | -6.29 | -2.12 | 298 |  |
| **2** | **a**-*C*2h | 0.0 | 40.9 | 1.367 | 3.04 | 2.98 | -5.24 | -1.51 | 332 | 370 |
| **2** | **t**-*D*2 | 49.7 | 2.7 | 1.413 | 3.09 | 2.70 | -4.28 | -2.21 | 598 | 640 |
| **2** | **s**-*C*2v | 0.0 | 42.5 | 1.370 | 3.14 | 2.01 | -5.42 | -1.15 | 290 |  |
| **3** | **a**-*C*2h | 0.0 | 49.5 | 1.362 | 3.20 | 3.46 | -5.49 | -1.46 | 308 | 355 |
| **3** | **s**-*C*2v | 0.0 | 51.9 | 1.362 | 3.20 | 2.15 | -5.61 | -1.08 | 273 | 325 |
| **3** | **t**-*D*2 | 57.8 | 8.0 | 1.436 | 3.13 | 3.03 | -4.18 | -2.48 | 699 |  |
| **4** | **t**-*D*2 | 34.0 | 2.4 | 1.381 | 3.21 | 2.24 | -5.34 | -2.50 | 436 | 440 |
| **4** | **a**-*C*2h | 0.0 | 23.5 | 1.375 | 3.06 | 2.08 | -5.61 | -2.18 | 361 |  |
| **4** | **s**-*C*2v | 0.0 | 20.5 | 1.384 | 3.13 | 1.72 | -5.71 | -1.99 | 334 |  |
| **5** | **a**-*C*2h | 0.0 | 52.4 | 1.356 | 3.50 | 4.07 | -5.48 | -1.18 | 288 | 282 |
| **5** | **s**-*C*2v | 0.0 | 55.6 | 1.354 | 3.29 | 2.39 | -5.55 | -1.16 | 282 | 280 |
| **5** | **t**-*D*2 | 65.9 | 22.6 | 1.469 | 3.29 | 3.54 | -3.96 | -2.40 | 799 |  |
| **6** | **t**-*C*2 | 42.2 | 3.9/3.8 | 1.399 | 3.13 | 2.48 | -4.83 | -2.33 | 497 | 533 |
| **6** | **au**-*C*s | 0.0 | 47.2/15.1 | 1.370 | 3.05 | 2.42 | -5.50 | -1.85 | 340 |  |
| **7** | **t**-*C*2 | 44.1 | 6.5/4.5 | 1.401 | 3.12 | 2.58 | -5.33 | -3.00 | 531 | 564 |
| **7** | **au**-*C*s | 0.0 | 47.2/16.4 | 1.370 | 3.02 | 2.51 | -5.83 | -2.31 | 353 |  |
| **8** | **au**-*C*s | 0.0 | 42.1/40.3 | 1.370 | 3.01 | 3.05 | -5.63 | -2.07 | 349 | 390 |
| **8** | **t**-*C*2 | 53.3 | 2.2/4.2 | 1.424 | 3.12 | 2.82 | -4.79 | -2.85 | 639 | 700 |
| **8** | **su**-*C*s | 0.0 | 44.4/40.2 | 1.372 | 3.10 | 2.02 | -5.76 | -1.96 | 326 |  |

*a* Pure twist of the central ethylene bond: ***ω*** = ½(***τ***C9a-C9-C9’-C9a’ + ***τ***C8a-C9-C9’-C8a’).

*b* Folding of the tricyclic moieties defined by the dihedral ***φ*** of the least-squares-planes of the aromatic rings.

*c* HOMO-LUMO gap.

*d* Longest wave length UV-Vis absorption.
